# Supplementary material
Source: ML conference proceedings conference paper supplement (https://proceedings.neurips.cc/paper_files/paper/2016/hash/10a5ab2db37feedfdeaab192ead4ac0e-Abstract.html)
Supplement: Supplementary file [file 10a5ab2db37feedfdeaab192ead4ac0e-Supplemental.zip]

---

# Supplementary Materials for "A Communication-Efficient Parallel Algorithm for Decision Tree"

---

Qi Meng<sup>1\*</sup>, Guolin Ke<sup>2\*</sup>, Taifeng Wang<sup>2</sup>, Wei Chen<sup>2</sup>, Qiwei Ye<sup>2</sup>,  
Zhi-Ming Ma<sup>3</sup>, Tie-Yan Liu<sup>2</sup>

<sup>1</sup>Peking University   <sup>2</sup>Microsoft Research

<sup>3</sup>Chinese Academy of Mathematics and Systems Science

<sup>1</sup>qimeng13@pku.edu.cn; <sup>2</sup>{Guolin.Ke, taifengw, wche, qiweye, tie-yan.liu}@microsoft.com;

<sup>3</sup>mazm@amt.ac.cn

This supplementary document is composed of the proofs for Theorem 4.1 (for both regression and classification) and Theorem 4.2 in the paper "A Communication-Efficient Parallel Algorithm for Decision Tree".

First of all, we review the definitions of information gain in classification and variance gain in regression.

**Definition 0.1** [1][2] *In classification, the information gain (IG) for attribute  $X_j \in [w_1, w_2]$  at node  $O$ , is defined as the entropy reduction of the output  $Y$  after splitting node  $O$  by attribute  $X_j$  at  $w$ , i.e.,*

$$\begin{aligned} IG_j(w; O) &= \mathcal{H}_j - (\mathcal{H}_j^l(w) + \mathcal{H}_j^r(w)) \\ &= P(w_1 \leq X_j \leq w_2)H(Y|w_1 \leq X_j \leq w_2) - P(w_1 \leq X_j < w)H(Y|w_1 \leq X_j < w) \\ &\quad - P(w \leq X_j \leq w_2)H(Y|w \leq X_j \leq w_2), \end{aligned}$$

where  $H(\cdot|\cdot)$  denotes the conditional entropy.

*In regression, the variance gain (VG) for attribute  $X_j \in [w_1, w_2]$  at node  $O$ , is defined as variance reduction of the output  $Y$  after splitting node  $O$  by attribute  $X_j$  at  $w$ , i.e.,*

$$\begin{aligned} VG_j(w; O) &= \sigma_j - (\sigma_j^l(w) + \sigma_j^r(w)) \\ &= P(w_1 \leq X_j \leq w_2)\text{Var}[Y|w_1 \leq X_j \leq w_2] - P(w_1 \leq X_j < w)\text{Var}[Y|w_1 \leq X_j < w] \\ &\quad - P(w \leq X_j \leq w_2)\text{Var}[Y|w \leq X_j \leq w_2], \end{aligned}$$

where  $\text{Var}[\cdot|\cdot]$  denotes the conditional variance.

The conditional entropy  $H(\cdot|\cdot)$  and the conditional variance  $\text{Var}(\cdot|\cdot)$  are calculated according to the conditional distribution  $P(\cdot|\cdot)$ . For  $K$  class classification, we assume  $Y$  is a discrete random variable which takes value from the set  $\{1, \dots, K\}$  and we have

$$H(Y|w_1 \leq X_j \leq w_2) = -\mathbb{E}_{(Y|w_1 \leq X_j \leq w_2)} \log p(Y|w_1 \leq X_j \leq w_2) \quad (1)$$

$$= -\sum_{k=1}^K p(Y = k|w_1 \leq X_j \leq w_2) \log p(Y = k|w_1 \leq X_j \leq w_2). \quad (2)$$

For regression, we assume that  $Y$  is a continuous random variable and

$$\text{Var}(Y|w_1 \leq X_j \leq w_2) = \mathbb{E}[(Y - \mathbb{E}[Y|w_1 \leq X_j \leq w_2])^2|w_1 \leq X_j \leq w_2] \quad (3)$$

$$= \int p(y|w_1 \leq X_j \leq w_2) y^2 dy - \left( \int p(y|w_1 \leq X_j \leq w_2) y dy \right)^2. \quad (4)$$

---

\*Denotes equal contribution. This work was done when the first author was visiting Microsoft Research Asia.

## 1 Theorem 4.1 and its Proof for classification and regression

**Theorem 4.1:** In classification, suppose we have  $M$  local machines, and each one has  $n$  training data. PV-Tree at an arbitrary tree node with local voting size  $k$  and global majority voting size  $2k$  will select the most informative attribute with a probability at least

$$\sum_{m=[M/2+1]}^M C_M^m \left( 1 - \left( \sum_{j=k+1}^d \delta_{(j)}(n, k) \right) \right)^m \left( \sum_{j=k+1}^d \delta_{(j)}(n, k) \right)^{M-m},$$

where  $\delta_{(j)}(n, k) = \alpha_{(j)}(n) + 4e^{-c_{(j)}n} (l_{(j)}(k))^2$  with  $\lim_{n \rightarrow \infty} \alpha_{(j)}(n) = 0$  and  $c_{(j)}$  is constant.

### Proof for classification:

Firstly we introduce some notations. We use subscript  $n$  to denote the corresponding empirical statistics, which is calculated based on the empirical distribution  $\mathbb{P}_n$ . Let  $w_j^* = \arg\max_w IG_j(w)$  and  $w_{n,j}^* = \arg\max_w IG_{n,j}(w)$ . We denote  $IG_j(w_j^*)$  as  $IG_j$ , which is the largest information gain for attribute  $j$ . We denote  $IG_{n,j}(w_{n,j}^*)$  as  $IG_{n,j}$ , which is the largest empirical information gain for attribute  $j$ . As we defined in the main paper, we denote the index of attribute with the  $j$ -th largest information gain as  $(j)$ , and its corresponding information gain as  $IG_{(j)}$ , i.e.,

$$IG_{(1)} \geq \dots \geq IG_{(j)} \geq \dots \geq IG_{(d)}.$$

The corresponding empirical information gain for attribute  $(j)$  denoted as

$$IG_{n,(1)}, \dots, IG_{n,(j)}, \dots, IG_{n,(d)}.$$

Note that  $IG_{n,(1)}, \dots, IG_{n,(j)}, \dots, IG_{n,(d)}$  may not be in an increasing order. Similarly, we denote the index of attribute with the  $j$ -th largest empirical information gain as  $(j')$ , and its corresponding empirical information gain as  $IG_{n,(j')}$ , i.e.,

$$IG_{n,(1')} \geq \dots \geq IG_{n,(j')} \geq \dots \geq IG_{n,(d')}.$$

Our proof idea is as follows:

*Step 1:* Because  $IG_{n,j} \in d(IG_j, l_j(k))$  is a sufficient condition for  $(1) \in \{(1'), \dots, (k')\}$  to be satisfied<sup>2</sup>, we use concentration inequalities to derive a lower bound of probability for  $IG_{n,j} \in d(IG_j, l_j(k))$ ,  $\forall j$ , where  $d(x, \epsilon)$  denotes the neighborhood of  $x$  with radius  $\epsilon$ .

*Step 2:* By local top- $k$  and global top- $2k$  voting, the most informative attribute  $(1)$  will be contained in the global selected set, i.e.,  $(1) \in \{(1'), \dots, (k')\}$ , if only no less than  $[M/2 + 1]$  local workers select it. We calculate the probability for the case no less than  $[M/2 + 1]$  of all machines select attribute  $(1)$  using binomial distribution.

Firstly, we give the probability to ensure  $(1) \in \{(1'), \dots, (k')\}$ . We bound the difference between the information gain and the empirical information gain for an arbitrary attribute. To be clear, we will prove, with probability at least  $\delta_j(n, k)$ , we have

$$|IG_{n,j} - IG_j| \leq l_j(k).$$

For simplify the notations, let  $H_j^l(w) = H(Y|w_1 \leq X_j \leq w)$ ,  $P_j^l(w) = P(w_1 \leq X_j \leq w)$ ,  $H_j^r(w) = H(Y|w \leq X_j \leq w_2)$  and  $P_j^r(w) = P(w \leq X_j \leq w_2)$ . We decompose  $\mathcal{H}_{n,j}^l(w_{n,j}^*) - \mathcal{H}_j^l(w_j^*)$  as

$$\mathcal{H}_{n,j}^l(w_{n,j}^*) - \mathcal{H}_j^l(w_j^*) \tag{5}$$

$$= P_{n,j}^l(w_{n,j}^*) H_{n,j}^l(w_{n,j}^*) - P_j^l(w_j^*) H_j^l(w_j^*) \tag{6}$$

$$= P_{n,j}^l(w_{n,j}^*) H_{n,j}^l(w_{n,j}^*) - P_{n,j}^l(w_j^*) H_j^l(w_j^*) + P_{n,j}^l(w_j^*) H_j^l(w_j^*) - P_j^l(w_j^*) H_j^l(w_j^*). \tag{7}$$

We decompose  $\mathcal{H}_{n,j}^r(w_{n,j}^*) - \mathcal{H}_j^r(w_j^*)$  in a similar way, i.e.,

$$\mathcal{H}_{n,j}^r(w_{n,j}^*) - \mathcal{H}_j^r(w_j^*) \tag{8}$$

$$= P_{n,j}^r(w_{n,j}^*) H_{n,j}^r(w_{n,j}^*) - P_{n,j}^r(w_j^*) H_j^r(w_j^*) + P_{n,j}^r(w_j^*) H_j^r(w_j^*) - P_j^r(w_j^*) H_j^r(w_j^*). \tag{9}$$

<sup>2</sup>In order to  $(1) \in \{(1'), \dots, (k')\}$ , the number of  $IG_{n,j}$  which is larger than  $IG_{n,(1)}$  is at most  $k - 1$ .

By adding Ineq.(7) and Ineq.(9), we have the following,

$$\begin{aligned}
& P(|IG_{n,j} - IG_j| > l_j(k)) \\
&= P\left(\left|\mathcal{H}_{n,j}^l(w_{n,j}^*) + \mathcal{H}_{n,j}^r(w_{n,j}^*) - (\mathcal{H}_j^l(w_j^*) + \mathcal{H}_j^r(w_j^*))\right| > l_j(k)\right) \\
&\leq P\left(\left|P_{n,j}^l(w_j^*)H_j^l(w_j^*) - P_j^l(w_j^*)H_j^l(w_j^*)\right| > \frac{l_j(k)}{3}\right) + \\
&P\left(\left|P_{n,j}^r(w_j^*)H_j^r(w_j^*) - P_j^r(w_j^*)H_j^r(w_j^*)\right| > \frac{l_j(k)}{3}\right) + \\
&P\left(\left|P_{n,j}^l(w_{n,j}^*)H_{n,j}^l(w_{n,j}^*) - P_{n,j}^l(w_j^*)H_j^l(w_j^*) + P_{n,j}^r(w_{n,j}^*)H_{n,j}^r(w_{n,j}^*) - P_{n,j}^r(w_j^*)H_j^r(w_j^*)\right| > \frac{l_j(k)}{3}\right) \\
&\triangleq I_1 + I_2 + I_3
\end{aligned}$$

For term  $I_1$ , by using Hoeffding's inequality, we have

$$I_1 \leq P\left(H_j^l(w_j^*) \times |P_j^l(w_j^*) - P_{n,j}^l(w_j^*)| > \frac{l_j(k)}{3}\right) \quad (10)$$

$$\leq P\left(\left|P_j^l(w_j^*) - P_{n,j}^l(w_j^*)\right| > \frac{l_j(k)}{3H_j^l(w_j^*)}\right) \quad (11)$$

$$\leq 2 \exp\left(-\frac{2nl_j(k)^2}{9(H_j^l(w_j^*))^2}\right) \quad (12)$$

Similarly, for term  $I_2$ , we have

$$I_2 \leq 2 \exp\left(-\frac{2nl_j(k)^2}{9(H_j^r(w_j^*))^2}\right) \quad (13)$$

Let  $c_j = \min\left\{\frac{2}{9(H_j^l(w_j^*))^2}, \frac{2}{9(H_j^r(w_j^*))^2}\right\}$ , we have

$$I_1 + I_2 \leq 4 \exp(-c_j nl_j(k)^2). \quad (14)$$

For the term  $I_3$ , we have

$$\begin{aligned}
& J \\
&= P_{n,j}^l(w_{n,j}^*)H_{n,j}^l(w_{n,j}^*) - P_{n,j}^l(w_j^*)H_j^l(w_j^*) + P_{n,j}^r(w_{n,j}^*)H_{n,j}^r(w_{n,j}^*) - P_{n,j}^r(w_j^*)H_j^r(w_j^*) \\
&= \frac{1}{n} \sum_{i=1}^n I(w_1 \leq x_{i,j} \leq w_{n,j}^*)H_{n,j}^l(w_{n,j}^*) + \frac{1}{n} \sum_{i=1}^n I(w_{n,j}^* < x_{i,j} \leq w_2)H_{n,j}^r(w_{n,j}^*) \\
&\quad - \frac{1}{n} \sum_{i=1}^n I(w_1 \leq x_{i,j} \leq w_j^*)H_j^l(w_j^*) - \frac{1}{n} \sum_{i=1}^n I(w_j^* < x_{i,j} \leq w_2)H_j^r(w_j^*),
\end{aligned}$$

where  $x_{i,j}$  is the  $j$ -th attribute for the  $i$ -th instance in the training set.

Let  $\Theta$  denote the set of all possible values of  $(p_1^l, p_1^r, \dots, p_{K-1}^l, p_{K-1}^r, w_j)$ , where  $p_k^l = P(Y = k | w_1 \leq X_j \leq w_j)$  and  $p_k^r = P(Y = k | w_j < X_j \leq w_2)$ . Define the criterion function  $\mathbb{M}(\theta) = Pm_\theta$ , where  $m_\theta(x, y) = -\log p_k^l I(w_1 \leq x \leq w_j) - \log p_k^r I(w_2 \geq x > w_j)$  if  $y = k$ . The vector  $\theta^* = (p_1^*, p_1^*, \dots, p_{K-1}^*, p_{K-1}^*, w_j^*)$  maximizes  $\mathbb{M}(\theta)$ , while  $\theta_n^* = (p_{n,1}^*, p_{n,1}^r, \dots, p_{n,K-1}^*, p_{n,K-1}^r, w_{n,j}^*)$  minimizes  $\mathbb{M}_n(\theta)$ . Straightforward algebra shows that

$$(m_\theta - m_{\theta^*})(X, Y) = I(Y = k)[(\log p_k^{l*} - \log p_k^{r*})(I(w_1 \leq X \leq w_{j,n}^*) - I(w_1 \leq X < d_j^*)) \quad (15)$$

$$+ (\log p_{n,k}^{l*} - \log p_k^{l*})I(w_1 \leq X \leq w_{n,j}^*) \quad (16)$$

$$+ (\log p_{n,k}^{r*} - \log p_k^{r*})I(w_{n,j}^* \leq X \leq w_2)] \quad (17)$$

By following the proof of Theorem 1 in [3], we can get that  $n^{2/3}I_3$  converges to  $c_2 \max_t Q(t)$ , where  $c_2$  is a constant and  $Q(t)$  is composed by the standard two-sided Brownian Motion [3]. Therefore, we have

$$P\left(|J| > c_2 n^{-\frac{2}{3}} q_\alpha\right) < \alpha. \quad (18)$$

where  $q_\alpha$  is the upper  $\alpha$ -quantile of  $\max_t Q(t)$ . Let  $c_2 n^{-\frac{2}{3}} q_{\alpha_j(n)} = \frac{l_j(k)}{3}$ . With probability at most  $\alpha_j(n)$ , we have  $IG_{n,j}(w_j^*) - IG_{n,j} > \frac{l_j(k)}{2}$ , i.e.,

$$I_2 = P\left(|J| > \frac{l_j(k)}{3}\right) < \alpha_j(n) \quad (19)$$

By combining Inequalities (14) and (19), we have, with probability at most  $\delta_j(n, k) = \alpha_j(n) + 4 \exp(-c_j n l_j(k)^2)$ ,

$$|IG_{n,j} - IG_j| > l_j(k). \quad (20)$$

Thus we can get

$$P(|IG_{n,(j)} - IG_{(j)}| \leq l_j(k), \forall j \geq k+1) \geq 1 - \sum_{j=k+1}^d \delta_{(j)}(n, k). \quad (21)$$

By binomial distribution, we can derive the results in the theorem.  $\square$

### Proof for regression:

The proof is similar to classification. We continue to use notations in the previous section and just substitute  $IG$  to  $VG$ .

Similarly, we will prove, with probability at least  $\delta_j(n, k)$ , we have

$$|VG_{n,j} - VG_j| \leq l_j(k).$$

By the definition of variance gain, we have the following,

$$\begin{aligned} & P(|VG_{n,j} - VG_j| > l_j(k)) \\ & \leq P(|\sigma_{n,j}^l(w_{n,j}^*) + \sigma_{n,j}^r(w_{n,j}^*) - \sigma_j^l(w_j^*) - \sigma_j^r(w_j^*)| > l_j(k)) \\ & \leq P\left(\left|P_{n,j}^l(w_j^*)\sigma_j^l(w_j^*) - P_j^l(w_j^*)\sigma_j^l(w_j^*)\right| > \frac{l_j(k)}{3}\right) + \\ & \quad P\left(\left|P_{n,j}^r(w_j^*)\sigma_j^r(w_j^*) - P_j^r(w_j^*)\sigma_j^r(w_j^*)\right| > \frac{l_j(k)}{3}\right) + \\ & \quad P\left(\left|P_{n,j}^l(w_{n,j}^*)\sigma_{n,j}^l(w_{n,j}^*) - P_{n,j}^l(w_j^*)\sigma_j^l(w_j^*) + P_{n,j}^r(w_{n,j}^*)\sigma_{n,j}^r(w_{n,j}^*) - P_{n,j}^r(w_j^*)\sigma_j^r(w_j^*)\right| > \frac{l_j(k)}{3}\right) \\ & \triangleq I_1 + I_2 + I_3 \end{aligned}$$

For term  $I_1$ , by using Hoeffding's inequality, we have

$$\begin{aligned} I_1 & \leq P\left(\sigma_j^l(w_j^*) \times |P_j^l(w_j^*) - P_{n,j}^l(w_j^*)| > \frac{l_j(k)}{3}\right) \\ & \leq P\left(\left|P_j^l(w_j^*) - P_{n,j}^l(w_j^*)\right| > \frac{l_j(k)}{3\sigma_j^l(w_j^*)}\right) \end{aligned} \quad (22)$$

$$\leq 2 \exp\left(-\frac{2nl_j(k)^2}{9(\sigma_j^l(w_j^*))^2}\right) \quad (23)$$

Similarly, for term  $I_2$ , we have

$$I_2 \leq 2 \exp\left(-\frac{2nl_j(k)^2}{9(\sigma_j^r(w_j^*))^2}\right) \quad (24)$$

Let  $c_j = \min\left\{\frac{2}{9(\sigma_j^l(w_j^*))^2}, \frac{2}{9(\sigma_j^r(w_j^*))^2}\right\}$ , we have

$$I_1 + I_2 \leq 4 \exp(-c_j n l_j(k)^2). \quad (25)$$

For the term  $I_3$ , let  $J = P_{n,j}^l(w_{n,j}^*)\sigma_{n,j}^l(w_{n,j}^*) - P_{n,j}^l(w_j^*)\sigma_j^l(w_j^*) + P_{n,j}^r(w_{n,j}^*)\sigma_{n,j}^r(w_{n,j}^*) - P_{n,j}^r(w_j^*)\sigma_j^r(w_j^*)$ . According to Theorem 2.2 established by [3], the following holds,

$$P(|J| > c_2 n^{-\frac{2}{3}} q_\alpha) < \alpha. \quad (26)$$

where  $c_2$  is a constant for fixed distribution  $P$  and  $q_\alpha$  is the upper  $\alpha$ -quantile of the standard two-sided Brownian Motion [3]. With probability at most  $\alpha_j(n)$ , we have  $|J| > \frac{l_j(k)}{3}$ , i.e.,

$$I_3 = P\left(|J| > \frac{l_j(k)}{3}\right) < \alpha_j(n) \quad (27)$$

By combining Ineq.(25) and (27), we have, with probability at most  $\delta_j(n, k) = \alpha_j(n) + 4 \exp(-c_j n l_j(k)^2)$ ,

$$|VG_{n,j} - VG_j| > l_j(k). \quad (28)$$

Thus we can get

$$P\left(|VG_{n,(j)} - VG_{(j)}| \leq h, \forall j \geq k+1\right) \geq 1 - \sum_{j=k+1}^d \delta_{(j)}(n, k). \quad (29)$$

By binomial distribution, we can derive the results in the theorem.  $\square$

## 2 Theorem 4.2 and its proof

**Theorem 4.2:** We denote quantized histogram with  $b$  bins of the underlying distribution  $P$  as  $P^b$ , that of the empirical distribution  $P_n$  as  $P_n^b$ , the information gain of  $X_j$  calculated under the distribution  $P^b$  and  $P_n^b$  as  $IG_j^b$  and  $IG_{n,j}^b$  respectively, and  $f_j(b) \triangleq |IG_j - IG_j^b|$ . Then, for  $\epsilon \leq \min_{j=1, \dots, d} f_j(b)$ , with probability at least  $\delta_j(n, f_j(b) - \epsilon)$ , we have  $|IG_{n,j}^b - IG_j^b| > \epsilon$ .

**Proof:**

First,  $|IG_{n,j}^b - IG_j^b| = |IG_{n,j}^b - IG_j^b + IG_j^b - IG_j| \geq ||IG_{n,j}^b - IG_j^b| - |f_j(b)||$ . Second, when  $n$  is large enough, we have  $|f_j(b)| - |IG_{n,j}^b - IG_j^b| > \epsilon$  with probability  $\delta_j(n, f_j(b) - \epsilon)$  for  $\epsilon \leq \min_{j=1, \dots, d} f_j(b)$ . Thus, the proposition is proven.  $\square$

## References

- [1] Jerome Friedman, Trevor Hastie, and Robert Tibshirani. *The elements of statistical learning*, volume 1. Springer series in statistics Springer, Berlin, 2001.
- [2] J. Ross Quinlan. Induction of decision trees. In *Machine learning*, volume 1, pages 81–106. Springer, 1986.
- [3] Moulinath Banerjee, Ian W McKeague, et al. Confidence sets for split points in decision trees. *The Annals of Statistics*, 35(2):543–574, 2007.
